# Supplementary material
Source: ML conference proceedings conference paper supplement (https://openreview.net/forum?id=ey5K1W1Txi)
Supplement: supplementary_material [file attachment]

## 495 A. Algebra definitions

### 496 A.1. Formal definitions for Universal Algebra

497 Universal algebra is the field of mathematics that studies algebraic structures, which are defined as a set  $A$  along with its  
 498 own collection of operations. An  $n$ -ary operation on  $A$  is a function that takes  $n$  elements of  $A$  and returns a single element  
 499 from the set. More formally (Burris & Sankappanavar, 1981b; Jonsson, 1967; Day, 1969):

500 **Definition 5. N-ary function** For  $A$  non-empty set and  $n$  nonnegative integer we define  $A^0 = \{\emptyset\}$  and, for  $n > 0$ ,  $A^n$  is  
 501 the set of  $n$ -tuples of elements from  $A$ . An  $n$ -ary operation (or function) on  $A$  is any function  $f$  from  $A^n$  to  $A$ ;  $n$  is the arity  
 502 (or rank) of  $f$ . An operation  $f$  on  $A$  is called an  $n$ -ary operation if its arity is  $n$ .

503 **Definition 6. Algebraic Structure** An algebra  $\mathcal{A}$  is a pair  $\langle A, F \rangle$  where  $A$  is a non-empty set called universe and  $F$  is a set  
 504 of finitary operations on  $A$ .

505 Apart from the operations on  $A$ , an algebra is further defined by axioms, that in the particular case of universal algebras are  
 506 often of the form of identities. The collection of algebraic structures defined by equational laws are called varieties. (Hyland  
 507 & Power, 2007)

508 **Definition 7. Variety** A nonempty class  $\mathbf{K}$  of algebras of type  $\mathcal{F}$  is called a variety if it is closed under subalgebras,  
 509 homomorphic images, and direct products.

510 **Definition 8.** A *lattice*  $\mathbf{L}$  is an algebraic structure composed by a non-empty set  $L$  and two binary operations  $\vee$  and  $\wedge$   
 511 satisfying the following axioms and their duals obtained exchanging  $\vee$  and  $\wedge$ :

$$\begin{aligned}
 512 \quad x \vee y &\approx y \vee x && \text{(commutativity)} \\
 513 \quad x \vee (y \vee z) &\approx (x \vee y) && \text{(associativity)} \\
 514 \quad x \vee x &\approx x && \text{(idempotency)} \\
 515 \quad x &\approx x \vee (x \wedge y) && \text{(absorption)}
 \end{aligned}$$

516 **Theorem 3** ((Birkhoff, 1940)). *Definition 2 and Definition 8 are equivalent.*

517 Congruence lattices of algebraic structures are partially ordered sets such that every pair of elements has unique supremum  
 518 and infimum determined by the underlying algebra. This object is important relatively to algebraic structures' properties,  
 519 many of which can be described by omission or admission of certain subpatterns in a graph.

### 520 Definition 9. Congruence Lattice

521 For every algebra  $\mathcal{A}$  on the set  $A$ , the identity relation on  $A$ , and  $A \times A$  are trivial congruences. An algebra with no other  
 522 congruences is called simple. Let  $\text{Con}(\mathcal{A})$  be the set of congruences on the algebra  $\mathcal{A}$ . Because congruences are closed  
 523 under intersection, we can define a meet operation:  $\wedge : \text{Con}(\mathcal{A}) \times \text{Con}(\mathcal{A}) \rightarrow \text{Con}(\mathcal{A})$  by simply taking the intersection  
 524 of the congruences  $E_1 \wedge E_2 = E_1 \cap E_2$ . Congruences are not closed under union, however we can define the closure  
 525 operator of any binary relation  $E$ , with respect to a fixed algebra  $\mathcal{A}$ , such that it is a congruence, in the following way:  
 526  $\langle E \rangle_{\mathcal{A}} = \bigcap \{F \in \text{Con}(\mathcal{A}) \mid E \subseteq F\}$ . Note that the closure of a binary relation is a congruence and thus depends on the  
 527 operations in  $\mathcal{A}$ , not just on the carrier set. Now define  $\vee : \text{Con}(\mathcal{A}) \times \text{Con}(\mathcal{A}) \rightarrow \text{Con}(\mathcal{A})$  as  $E_1 \vee E_2 = \langle E_1 \cup E_2 \rangle_{\mathcal{A}}$ . For  
 528 every algebra  $\mathcal{A}$ ,  $(\text{Con}(\mathcal{A}), \wedge, \vee)$  with the two operations defined above forms a lattice, called the congruence lattice of  $\mathcal{A}$ .

529 **Definition 10. Subalgebra** Let  $\mathbf{A}$  and  $\mathbf{B}$  be two algebras of the same type. Then  $\mathbf{B}$  is a *subalgebra* of  $\mathbf{A}$  if  $B \subseteq A$  and  
 530 every fundamental operation of  $\mathbf{B}$  is the restriction of the corresponding operation of  $\mathbf{A}$ , i.e., for each function symbol  $f$ ,  
 531  $f^{\mathbf{B}}$  is  $f^{\mathbf{A}}$  restricted to  $\mathbf{B}$ .

532 **Definition 11. Homomorphic image** Suppose  $\mathbf{A}$  and  $\mathbf{B}$  are two algebras of the same type  $\mathcal{F}$ . A mapping  $\alpha : A \rightarrow B$  is  
 533 called a *homomorphism* from  $\mathbf{A}$  to  $\mathbf{B}$  if

$$534 \quad \alpha f^{\mathbf{A}}(a_1, \dots, a_n) = f^{\mathbf{B}}(\alpha a_1, \dots, \alpha a_n)$$

535 for each  $n$ -ary  $f$  in  $\mathcal{F}$  and each sequence  $a_1, \dots, a_n$  from  $\mathbf{A}$ . If, in addition, the mapping  $\alpha$  is onto then  $\mathbf{B}$  is said to be a  
 536 homomorphic image of  $\mathbf{A}$ .

550 **Definition 12. Direct product** Let  $\mathbf{A}_1$  and  $\mathbf{A}_2$  be two algebras of the same type  $\mathcal{F}$ . We define the direct product  $\mathbf{A}_1 \times \mathbf{A}_2$   
551 to be the algebra whose universe is the set  $A_1 \times A_2$ , and such that for  $f \in \mathcal{F}$  and  $a_i \in A_1, a'_i \in A_2, 1 \leq i \leq n$ ,  
552

$$553 \quad f^{\mathbf{A}_1 \times \mathbf{A}_2}(\langle a_1, a'_1 \rangle, \dots, \langle a_n, a'_n \rangle) = \langle f^{\mathbf{A}_1}(a_1, \dots, a_n), f^{\mathbf{A}_2}(a'_1, \dots, a'_n) \rangle$$

554  
555  
556  
557  
558  
559  
560  
561  
562  
563  
564  
565  
566  
567  
568  
569  
570  
571  
572  
573  
574  
575  
576  
577  
578  
579  
580  
581  
582  
583  
584  
585  
586  
587  
588  
589  
590  
591  
592  
593  
594  
595  
596  
597  
598  
599  
600  
601  
602  
603  
604
